# Supplementary material for: Patterns of SARS-CoV-2 Testing Preferences in a National Cohort in the United States: Latent Class Analysis of a Discrete Choice Experiment
Source: PubMed Central journal article supplement (PMC8722498; doi:10.2196/32846), 2021-12-30
Supplement: publichealth_v7i12e32846_app2.pdf [file publichealth_v7i12e32846_app2.pdf]

## Multimedia Appendix 2. SARS-CoV-2 testing discrete choice experiment attributes and levels

| Attributes & levels (abbreviated) <sup>a</sup>                          | Descriptive level text <sup>b</sup>                                                                                       |
|-------------------------------------------------------------------------|---------------------------------------------------------------------------------------------------------------------------|
| <b>Test</b>                                                             |                                                                                                                           |
| Serology                                                                | An antibody test that tells you if you've EVER had a COVID-19 infection                                                   |
| PCR <sup>c</sup>                                                        | A PCR test that tells you if you CURRENTLY have a COVID-19 infection                                                      |
| Both tests                                                              | BOTH an antibody test (EVER infected) and a PCR test (CURRENTLY infected)                                                 |
| <b>Specimen type</b>                                                    |                                                                                                                           |
| Finger prick                                                            | A small amount of blood from a finger prick                                                                               |
| Blood draw                                                              | A small tube of blood taken from your arm                                                                                 |
| Cheek                                                                   | Oral fluid from a swab of the inside of your cheek                                                                        |
| Spit                                                                    | A spit sample collected in a small cup                                                                                    |
| Nasal shallow                                                           | A SHALLOW swab of the inside of your nostrils                                                                             |
| NP <sup>d</sup> swab                                                    | A DEEP swab that goes far into your nasal passages                                                                        |
| Urine                                                                   | A urine sample collected in a small cup                                                                                   |
| <b>Venue</b>                                                            |                                                                                                                           |
| Home collection, receiving & returning kit in mail                      | You are mailed a package with the test kit, you collect the specimen, and mail it back to the lab                         |
| Home collection, receiving kit in mail & returning to a collection site | You are mailed a package with the test kit, you collect the specimen, and drop it off at a collection site near your home |
| Doctor's office or urgent care clinic                                   | You go to your doctor's office or an urgent care clinic to have the specimen collected                                    |
| Walk-in community testing site                                          | You go to a walk-in community testing site to have the specimen collected                                                 |
| Drive-through community testing site                                    | You go to a drive-thru community testing site to have the specimen collected (you stay in your car)                       |
| Pharmacy                                                                | You go to a local pharmacy to have the specimen collected                                                                 |
| <b>Results turnaround time</b>                                          |                                                                                                                           |
| Immediate                                                               | Immediately (within 15 minutes)                                                                                           |
| Same day                                                                | On the same day                                                                                                           |
| 48 hours                                                                | Within 48 hours                                                                                                           |
| 5 days                                                                  | Within 5 days                                                                                                             |
| Greater than 5 days                                                     | > 5 days                                                                                                                  |

### None – I wouldn't choose any of these

<sup>a</sup>Some combinations of attribute levels were prohibited. For example, a test scenario that included a specimen collected at home and returned to the lab via mail could not also include the immediate test result level.

<sup>b</sup>Descriptive text was displayed in the choice exercise.

<sup>c</sup>PCR=polymerase chain reaction

<sup>d</sup>NP=nasopharyngeal
