# Supplementary material for: Patterns of SARS-CoV-2 Testing Preferences in a National Cohort in the United States: Latent Class Analysis of a Discrete Choice Experiment
Source: PubMed Central journal article supplement (PMC8722498; doi:10.2196/32846), 2021-12-30
Supplement: publichealth_v7i12e32846_app5.pdf [file publichealth_v7i12e32846_app5.pdf]

## Multimedia Appendix 5. Summary of best replications of latent class analysis multinomial logit<sup>a</sup>

| Groups | Replication | LL <sup>b</sup> | LL difference from previous solution | AIC <sup>c</sup> | AIC difference from previous solution | BIC <sup>d</sup> | BIC difference from previous solution | Min class size | Max class size | Average class size |
|--------|-------------|-----------------|--------------------------------------|------------------|---------------------------------------|------------------|---------------------------------------|----------------|----------------|--------------------|
| 2      | 5           | -16284          | N/A                                  | 32642            | N/A                                   | 32941            | N/A                                   | 308            | 4485           | 2397               |
| 3      | 2           | -15975          | 309                                  | 32062            | 580                                   | 32515            | 427                                   | 193            | 2421           | 1598               |
| 4      | 2           | -15768          | 207                                  | 31686            | 376                                   | 32292            | 223                                   | 162            | 2252           | 1198               |
| 5      | 2           | -15602          | 165                                  | 31393            | 293                                   | 32153            | 139                                   | 171            | 1578           | 959                |
| 6      | 1           | -15549          | 53                                   | 31325            | 68                                    | 32238            | -85                                   | 180            | 1521           | 799                |
| 7      | 4           | -15504          | 46                                   | 31271            | 53                                    | 32338            | -100                                  | 175            | 1612           | 685                |
| 8      | 3           | -15477          | 27                                   | 31256            | 15                                    | 32477            | -138                                  | 142            | 920            | 599                |
| 9      | 5           | -15431          | 46                                   | 31202            | 53                                    | 32577            | -100                                  | 150            | 1116           | 533                |
| 10     | 1           | -15404          | 27                                   | 31186            | 16                                    | 32714            | -137                                  | 116            | 1339           | 479                |

<sup>a</sup>Starting seed=1

<sup>b</sup>LL=Log-likelihood

<sup>c</sup>AIC=Akaike information criterion

<sup>d</sup>BIC=Bayesian information criterion
