# Supplementary material for: Patterns of SARS-CoV-2 Testing Preferences in a National Cohort in the United States: Latent Class Analysis of a Discrete Choice Experiment
Source: PubMed Central journal article supplement (PMC8722498; doi:10.2196/32846), 2021-12-30
Supplement: publichealth_v7i12e32846_app6.pdf [file publichealth_v7i12e32846_app6.pdf]

## Multimedia Appendix 6

**Table S1. Zero-centered part-worth utilities<sup>a</sup> for SARS-CoV-2 testing attribute levels by preference pattern**

|                                                                             | <b>Overall<br/>4793 (100%)</b> | <b>Noninvasive home<br/>testers<br/>920 (19.2%)</b> | <b>Fast-track testers<br/>1235 (25.8%)</b> | <b>Dual testers<br/>889 (18.5%)</b> | <b>Noninvasive dual<br/>testers<br/>1578 (32.9%)</b> | <b>Hesitant home testers<br/>171 (3.6%)</b> |
|-----------------------------------------------------------------------------|--------------------------------|-----------------------------------------------------|--------------------------------------------|-------------------------------------|------------------------------------------------------|---------------------------------------------|
|                                                                             | <b>Mean (95% CI)</b>           | <b>Mean (95% CI)</b>                                | <b>Mean (95% CI)</b>                       | <b>Mean (95% CI)</b>                | <b>Mean (95% CI)</b>                                 | <b>Mean (95% CI)</b>                        |
| <b>Test type</b>                                                            |                                |                                                     |                                            |                                     |                                                      |                                             |
| Serology                                                                    | -41.7 (-42.6, -40.9)           | -28.2 (-29.1, -27.2)                                | -34.5 (-35.4, -33.5)                       | -97 (-98, -96)                      | -26.5 (-27.1, -25.9)                                 | -20 (-20.7, -19.3)                          |
| PCR                                                                         | -22.2 (-22.8, -21.6)           | -11.4 (-12.2, -10.6)                                | -18.5 (-19, -18)                           | 3.7 (3, 4.3)                        | -46.8 (-47.2, -46.4)                                 | -16.1 (-16.7, -15.6)                        |
| Both tests                                                                  | 64 (63.3, 64.6)                | 39.5 (38.5, 40.6)                                   | 53 (52.3, 53.6)                            | 93.3 (92.8, 93.8)                   | 73.3 (73, 73.7)                                      | 36.1 (35.4, 36.9)                           |
| <b>Specimen type</b>                                                        |                                |                                                     |                                            |                                     |                                                      |                                             |
| Finger prick                                                                | 19.3 (19, 19.5)                | 23.4 (23.1, 23.7)                                   | 19.7 (19.4, 20)                            | 2 (1.6, 2.3)                        | 25.7 (25.6, 25.9)                                    | 24.5 (24.3, 24.7)                           |
| Blood draw                                                                  | -18 (-18.5, -17.6)             | -41.3 (-42.1, -40.4)                                | -20.7 (-21, -20.4)                         | -18.7 (-19, -18.5)                  | -1.7 (-2, -1.4)                                      | -21.1 (-21.6, -20.5)                        |
| Cheek swab                                                                  | 29.5 (29.2, 29.7)              | 34 (33.7, 34.3)                                     | 25.4 (25.1, 25.6)                          | 16.4 (16.1, 16.7)                   | 37.8 (37.7, 38)                                      | 25.6 (25.3, 25.9)                           |
| Spit sample                                                                 | 25.3 (24.9, 25.7)              | 48.6 (47.9, 49.3)                                   | 13.3 (13, 13.6)                            | 14.2 (13.9, 14.5)                   | 28.1 (27.9, 28.4)                                    | 18.7 (18, 19.3)                             |
| Shallow nasal swab                                                          | 1.4 (1.1, 1.7)                 | 9.4 (9, 9.8)                                        | 7.5 (7.2, 7.7)                             | 6.8 (6.6, 7)                        | -10.5 (-10.7, -10.3)                                 | -3.5 (-3.9, -3.2)                           |
| Nasopharyngeal swab                                                         | -72.5 (-73.4, -71.6)           | -92.1 (-93, -91.1)                                  | -51.1 (-52, -50.3)                         | -30.5 (-31.4, -29.5)                | -100.9 (-101.4, -100.3)                              | -77.7 (-78.4, -76.9)                        |
| Urine                                                                       | 15 (14.8, 15.3)                | 17.9 (17.7, 18.2)                                   | 6 (5.8, 6.3)                               | 9.9 (9.7, 10)                       | 21.3 (21.2, 21.4)                                    | 33.5 (33, 34.1)                             |
| <b>Venue</b>                                                                |                                |                                                     |                                            |                                     |                                                      |                                             |
| Home collection, receiving kit in mail & returning kit in mail              | 17.4 (16.6, 18.2)              | 55.3 (54, 56.6)                                     | 5.4 (5, 5.8)                               | -4.1 (-4.5, -3.7)                   | 8.6 (8.3, 8.9)                                       | 93.2 (91.3, 95.2)                           |
| Home collection, receiving kit in the mail & returning to a collection site | 12.6 (12, 13.3)                | 42.7 (41.7, 43.7)                                   | -8.8 (-9.2, -8.3)                          | -5.2 (-5.6, -4.8)                   | 16.8 (16.5, 17.1)                                    | 60.2 (58.9, 61.6)                           |
| Doctor's office or urgent care clinic                                       | -16.1 (-16.5, -15.6)           | -41.6 (-42.4, -40.8)                                | -5.4 (-5.6, -5.1)                          | -4 (-4.3, -3.7)                     | -13.2 (-13.4, -13)                                   | -44.6 (-45.4, -43.8)                        |
| Walk-in community testing site                                              | -18.9 (-19.4, -18.3)           | -44.5 (-45.4, -43.6)                                | -6.6 (-6.9, -6.3)                          | -3.8 (-4.1, -3.5)                   | -16 (-16.2, -15.7)                                   | -75.9 (-77.4, -74.4)                        |
| Drive through community testing site                                        | 4.2 (3.9, 4.4)                 | 2.7 (2.5, 2.9)                                      | 10.8 (10.6, 11)                            | 12.2 (12, 12.4)                     | -3.5 (-3.7, -3.4)                                    | -6.9 (-7.3, -6.5)                           |
| Pharmacy                                                                    | 0.8 (0.5, 1.1)                 | -14.5 (-15.1, -14)                                  | 4.5 (4.3, 4.6)                             | 4.9 (4.8, 5)                        | 7.3 (7.2, 7.4)                                       | -26.1 (-26.8, -25.3)                        |
| <b>Results turnaround time</b>                                              |                                |                                                     |                                            |                                     |                                                      |                                             |
| Immediate                                                                   | 64.7 (64, 65.3)                | 42 (41.1, 43)                                       | 98.6 (97.9, 99.2)                          | 64.9 (64.5, 65.4)                   | 54.7 (54.2, 55.1)                                    | 32.5 (31.1, 33.8)                           |

|                     | <b>Overall<br/>4793 (100%)</b> | <b>Noninvasive home<br/>testers<br/>920 (19.2%)</b> | <b>Fast-track testers<br/>1235 (25.8%)</b> | <b>Dual testers<br/>889 (18.5%)</b> | <b>Noninvasive dual<br/>testers<br/>1578 (32.9%)</b> | <b>Hesitant home testers<br/>171 (3.6%)</b> |
|---------------------|--------------------------------|-----------------------------------------------------|--------------------------------------------|-------------------------------------|------------------------------------------------------|---------------------------------------------|
|                     | <b>Mean (95% CI)</b>           | <b>Mean (95% CI)</b>                                | <b>Mean (95% CI)</b>                       | <b>Mean (95% CI)</b>                | <b>Mean (95% CI)</b>                                 | <b>Mean (95% CI)</b>                        |
| Same day            | 38.8 (38.3, 39.3)              | 30.4 (29.8, 30.9)                                   | 63.8 (63.3, 64.4)                          | 40.5 (40.2, 40.9)                   | 25.1 (24.7, 25.5)                                    | 21.2 (20.3, 22.1)                           |
| 48 hours            | 8.3 (8.1, 8.4)                 | 1.4 (1.2, 1.7)                                      | 13.6 (13.5, 13.7)                          | 8.4 (8.3, 8.5)                      | 9.5 (9.5, 9.6)                                       | -5.2 (-5.6, -4.8)                           |
| 5 days              | -43 (-43.5, -42.5)             | -26.2 (-26.9, -25.5)                                | -66.9 (-67.4, -66.5)                       | -39 (-39.4, -38.6)                  | -39 (-39.3, -38.8)                                   | -18.5 (-19.5, -17.4)                        |
| Greater than 5 days | -68.7 (-69.6, -67.9)           | -47.7 (-48.6, -46.7)                                | -109.1 (-109.9, -108.3)                    | -74.9 (-75.4, -74.3)                | -50.2 (-50.8, -49.6)                                 | -30 (-31.6, -28.3)                          |
| <b>None</b>         | -232.6 (-234.4, -230.8)        | -299.6 (-302, -297.2)                               | -238 (-238.9, -237.1)                      | -217.4 (-218.3, -216.4)             | -226.6 (-227.3, -225.9)                              | 32.5 (23.8, 41.1)                           |

<sup>a</sup>Direction of the utility values implies the preference for the attribute level (negative=less preferred; positive=more preferred) and the magnitude of the utility implies the strength of preference.

<sup>b</sup>CI=Confidence interval

<sup>c</sup>PCR=polymerase chain reaction

**Table S2. Simulated uptake<sup>a</sup> of standard testing, less invasive testing, dual testing, and at-home testing scenarios by preference pattern**

|                                                                                                                       | <b>Overall<br/>4793 (100%)<br/>% (95% CI)<sup>b</sup></b> | <b>Noninvasive home<br/>testers<br/>920 (19.2%)<br/>% (95% CI)</b> | <b>Fast-track testers<br/>1235 (25.8%)<br/>% (95% CI)</b> | <b>Dual testers<br/>889 (18.5%)<br/>% (95% CI)</b> | <b>Noninvasive dual<br/>testers<br/>1578 (32.9%)<br/>% (95% CI)</b> | <b>Hesitant home<br/>testers<br/>171 (3.6%)<br/>% (95% CI)</b> |
|-----------------------------------------------------------------------------------------------------------------------|-----------------------------------------------------------|--------------------------------------------------------------------|-----------------------------------------------------------|----------------------------------------------------|---------------------------------------------------------------------|----------------------------------------------------------------|
| Standard testing scenarios                                                                                            |                                                           |                                                                    |                                                           |                                                    |                                                                     |                                                                |
| Viral test, NP <sup>c</sup> swab, drive-through community testing site, results within 48 hours                       | 6.6% (6.4%, 6.7%)                                         | 6.6% (6.3%, 6.8%)                                                  | 10.4% (10.1%, 10.7%)                                      | 10.9% (10.6%, 11.2%)                               | 1.3% (1.3%, 1.4%)                                                   | 4.3% (3.9%, 4.6%)                                              |
| Viral test, NP swab, walk-in community testing site, results within 48 hours                                          | 0.9 (0.9%, 1%)                                            | 0.5% (0.5%, 0.6%)                                                  | 1.8% (1.7%, 1.9%)                                         | 1.7% (1.6%, 1.8%)                                  | 0.1% (0.1%, 0.1%)                                                   | 0.3% (0.2%, 0.4%)                                              |
| Less invasive testing scenario                                                                                        |                                                           |                                                                    |                                                           |                                                    |                                                                     |                                                                |
| Viral test, saliva, walk-in community testing site, results within 48 hours                                           | 12.7% (12.6%, 12.9%)                                      | 18.2% (17.9%, 18.5%)                                               | 15.2% (14.9%, 15.4%)                                      | 11.8% (11.6%, 12.1%)                               | 8.9% (8.7%, 9.2%)                                                   | 5.8% (5.3%, 6.3%)                                              |
| Dual testing scenario                                                                                                 |                                                           |                                                                    |                                                           |                                                    |                                                                     |                                                                |
| Viral and antibody tests, finger prick, walk-in community testing site, results within 48 hours                       | 61.8% (61.2%, 62.4%)                                      | 35.5% (34.6%, 36.4%)                                               | 60.8% (60.3%, 61.3%)                                      | 65% (64.5%, 65.5%)                                 | 80.9% (80.5%, 81.3%)                                                | 18.3% (17%, 19.5%)                                             |
| At-home testing scenario                                                                                              |                                                           |                                                                    |                                                           |                                                    |                                                                     |                                                                |
| Viral test, shallow nasal swab, home collection, receiving kit in mail & returning kit in mail, results within 5 days | 16% (15.6%, 16.4%)                                        | 37.9% (37.1%, 38.7%)                                               | 10.9% (10.6%, 11.1%)                                      | 10.3% (10%, 10.6%)                                 | 8.1% (7.9%, 8.3%)                                                   | 38.2% (37.2%, 39.1%)                                           |
| None                                                                                                                  | 2% (1.8%, 2.1%)                                           | 1.3% (1.2%, 1.4%)                                                  | 1% (0.9%, 1.1%)                                           | 0.3% (0.2%, 0.3%)                                  | 0.6% (0.6%, 0.7%)                                                   | 33.3% (31.7%, 34.8%)                                           |

<sup>a</sup>Simulated preferences represent the proportion of individuals in each pattern that were predicted to prefer any given scenario. For each pattern, the lowest percentage=the least preferred and the highest percentage=the most preferred scenario.

<sup>b</sup>CI=confidence interval

<sup>c</sup>NP=nasopharyngeal

**Table S3. Sample characteristics, previous testing, COVID-19 diagnosis, and concern about infection stratified by preference pattern for SARS-CoV-2 testing**

|                                  | <b>Overall<br/>4793 (100%)</b> | <b>Noninvasive<br/>home testers<br/>920 (19.2%)</b> | <b>Fast-track<br/>testers<br/>1235 (25.8%)</b> | <b>Dual testers<br/>889 (18.5%)</b> | <b>Noninvasive<br/>dual testers<br/>1,78 (32.9%)</b> | <b>Hesitant home<br/>testers<br/>171 (3.6%)</b> | <b>P-<br/>value</b> |
|----------------------------------|--------------------------------|-----------------------------------------------------|------------------------------------------------|-------------------------------------|------------------------------------------------------|-------------------------------------------------|---------------------|
|                                  | <b>N (%)</b>                   | <b>N (%)</b>                                        | <b>N (%)</b>                                   | <b>N (%)</b>                        | <b>N (%)</b>                                         | <b>N (%)</b>                                    |                     |
| <b>Age group</b>                 |                                |                                                     |                                                |                                     |                                                      |                                                 | <b>.002</b>         |
| 18-39 years                      | 2489 (51.9%)                   | 516 (56.1%)                                         | 662 (53.6%)                                    | 464 (52.2%)                         | 778 (49.3%)                                          | 69 (40.4%)                                      |                     |
| 40-59 years                      | 1502 (31.3%)                   | 272 (29.6%)                                         | 378 (30.6%)                                    | 280 (31.5%)                         | 504 (31.9%)                                          | 68 (39.8%)                                      |                     |
| >=60 years                       | 802 (16.7%)                    | 132 (14.3%)                                         | 195 (15.8%)                                    | 145 (16.3%)                         | 296 (18.8%)                                          | 34 (19.9%)                                      |                     |
| <b>Gender</b>                    |                                |                                                     |                                                |                                     |                                                      |                                                 | <b>.012</b>         |
| Female                           | 2468 (51.5%)                   | 465 (50.5%)                                         | 583 (47.2%)                                    | 474 (53.3%)                         | 846 (53.6%)                                          | 100 (58.5%)                                     |                     |
| Male                             | 2193 (45.8%)                   | 432 (47%)                                           | 619 (50.1%)                                    | 385 (43.3%)                         | 691 (43.8%)                                          | 66 (38.6%)                                      |                     |
| Transgender, non-binary, other   | 132 (2.8%)                     | 23 (2.5%)                                           | 33 (2.7%)                                      | 30 (3.4%)                           | 41 (2.6%)                                            | 5 (2.9%)                                        |                     |
| <b>Race/ethnicity</b>            |                                |                                                     |                                                |                                     |                                                      |                                                 | <b>&lt;.001</b>     |
| Asian/Pacific Islander           | 356 (7.4%)                     | 66 (7.2%)                                           | 96 (7.8%)                                      | 63 (7.1%)                           | 118 (7.5%)                                           | 13 (7.6%)                                       |                     |
| Hispanic                         | 788 (16.4%)                    | 179 (19.5%)                                         | 239 (19.4%)                                    | 117 (13.2%)                         | 218 (13.8%)                                          | 35 (20.5%)                                      |                     |
| Non-Hispanic Black               | 471 (9.8%)                     | 116 (12.6%)                                         | 128 (10.4%)                                    | 68 (7.6%)                           | 134 (8.5%)                                           | 25 (14.6%)                                      |                     |
| Non-Hispanic White               | 3009 (62.8%)                   | 516 (56.1%)                                         | 724 (58.6%)                                    | 625 (70.3%)                         | 1059 (67.1%)                                         | 85 (49.7%)                                      |                     |
| Other                            | 161 (3.4%)                     | 40 (4.3%)                                           | 47 (3.8%)                                      | 15 (1.7%)                           | 47 (3%)                                              | 12 (7%)                                         |                     |
| Missing                          | 8 (0.2%)                       | 3 (0.3%)                                            | 1 (0.1%)                                       | 1 (0.1%)                            | 2 (0.1%)                                             | 1 (0.6%)                                        |                     |
| <b>Education</b>                 |                                |                                                     |                                                |                                     |                                                      |                                                 | <b>&lt;.001</b>     |
| Less than high school            | 69 (1.4%)                      | 15 (1.6%)                                           | 17 (1.4%)                                      | 10 (1.1%)                           | 25 (1.6%)                                            | 2 (1.2%)                                        |                     |
| High school graduate             | 448 (9.3%)                     | 120 (13%)                                           | 107 (8.7%)                                     | 64 (7.2%)                           | 133 (8.4%)                                           | 24 (14%)                                        |                     |
| Some college or technical school | 1241 (25.9%)                   | 275 (29.9%)                                         | 335 (27.1%)                                    | 184 (20.7%)                         | 403 (25.5%)                                          | 44 (25.7%)                                      |                     |
| College graduate                 | 3027 (63.2%)                   | 508 (55.2%)                                         | 775 (62.8%)                                    | 628 (70.6%)                         | 1015 (64.3%)                                         | 101 (59.1%)                                     |                     |
| Missing                          | 8 (0.2%)                       | 2 (0.2%)                                            | 1 (0.1%)                                       | 3 (0.3%)                            | 2 (0.1%)                                             | 0 (0%)                                          |                     |
| <b>Employment</b>                |                                |                                                     |                                                |                                     |                                                      |                                                 | <b>.002</b>         |
| Employed                         | 3077 (64.2%)                   | 597 (64.9%)                                         | 803 (65%)                                      | 579 (65.1%)                         | 1003 (63.6%)                                         | 95 (55.6%)                                      |                     |
| Out of work                      | 605 (12.6%)                    | 119 (12.9%)                                         | 171 (13.8%)                                    | 83 (9.3%)                           | 195 (12.4%)                                          | 37 (21.6%)                                      |                     |

|                                                                                                    | <b>Overall<br/>4793 (100%)</b> | <b>Noninvasive<br/>home testers<br/>920 (19.2%)</b> | <b>Fast-track<br/>testers<br/>1235 (25.8%)</b> | <b>Dual testers<br/>889 (18.5%)</b> | <b>Noninvasive<br/>dual testers<br/>1,78 (32.9%)</b> | <b>Hesitant home<br/>testers<br/>171 (3.6%)</b> | <b>P-<br/>value</b> |
|----------------------------------------------------------------------------------------------------|--------------------------------|-----------------------------------------------------|------------------------------------------------|-------------------------------------|------------------------------------------------------|-------------------------------------------------|---------------------|
|                                                                                                    | <b>N (%)</b>                   | <b>N (%)</b>                                        | <b>N (%)</b>                                   | <b>N (%)</b>                        | <b>N (%)</b>                                         | <b>N (%)</b>                                    |                     |
| Not in the workforce                                                                               | 1101 (23%)                     | 201 (21.8%)                                         | 258 (20.9%)                                    | 226 (25.4%)                         | 378 (24%)                                            | 38 (22.2%)                                      |                     |
| Missing                                                                                            | 10 (0.2%)                      | 3 (0.3%)                                            | 3 (0.2%)                                       | 1 (0.1%)                            | 2 (0.1%)                                             | 1 (0.6%)                                        |                     |
| Region                                                                                             |                                |                                                     |                                                |                                     |                                                      |                                                 | .27                 |
| Northeast                                                                                          | 1189 (24.8%)                   | 205 (22.3%)                                         | 308 (24.9%)                                    | 244 (27.4%)                         | 386 (24.5%)                                          | 46 (26.9%)                                      |                     |
| Midwest                                                                                            | 847 (17.7%)                    | 145 (15.8%)                                         | 225 (18.2%)                                    | 159 (17.9%)                         | 296 (18.8%)                                          | 22 (12.9%)                                      |                     |
| South                                                                                              | 1552 (32.4%)                   | 310 (33.7%)                                         | 410 (33.2%)                                    | 280 (31.5%)                         | 489 (31%)                                            | 63 (36.8%)                                      |                     |
| West                                                                                               | 1152 (24%)                     | 245 (26.6%)                                         | 280 (22.7%)                                    | 199 (22.4%)                         | 390 (24.7%)                                          | 38 (22.2%)                                      |                     |
| US Dependent                                                                                       | 7 (0.1%)                       | 3 (0.3%)                                            | 1 (0.1%)                                       | 1 (0.1%)                            | 2 (0.1%)                                             | 0 (0%)                                          |                     |
| Missing                                                                                            | 46 (1%)                        | 12 (1.3%)                                           | 11 (0.9%)                                      | 6 (0.7%)                            | 15 (1%)                                              | 2 (1.2%)                                        |                     |
| Urban                                                                                              | 2074 (43.3%)                   | 373 (40.5%)                                         | 558 (45.2%)                                    | 398 (44.8%)                         | 673 (42.6%)                                          | 72 (42.1%)                                      | .22                 |
| Any comorbidity (baseline)                                                                         | 1895 (39.5%)                   | 352 (38.3%)                                         | 490 (39.7%)                                    | 343 (38.6%)                         | 633 (40.1%)                                          | 77 (45%)                                        | .50                 |
| Reported previously testing for SARS-CoV-2                                                         | 1378 (28.8%)                   | 238 (25.9%)                                         | 424 (34.3%)                                    | 298 (33.5%)                         | 378 (24%)                                            | 40 (23.4%)                                      | <.001               |
| Reported previously receiving a laboratory-confirmed diagnosis of COVID-19                         | 243 (5.1%)                     | 55 (6%)                                             | 93 (7.5%)                                      | 35 (3.9%)                           | 51 (3.2%)                                            | 9 (5.3%)                                        | <.001               |
| Concern about getting infected with SARS-CoV-2 (among those without a previous COVID-19 diagnosis) |                                |                                                     |                                                |                                     |                                                      |                                                 | <.001               |
| Not at all worried/not too worried                                                                 | 1190 (26.1%)                   | 234 (27.1%)                                         | 273 (23.9%)                                    | 179 (21%)                           | 452 (29.6%)                                          | 52 (32.1%)                                      |                     |
| Somewhat worried                                                                                   | 2278 (50.1%)                   | 406 (46.9%)                                         | 573 (50.2%)                                    | 472 (55.3%)                         | 759 (49.7%)                                          | 68 (42%)                                        |                     |
| Very worried                                                                                       | 1075 (23.6%)                   | 223 (25.8%)                                         | 294 (25.7%)                                    | 202 (23.6%)                         | 314 (20.6%)                                          | 42 (25.9%)                                      |                     |
| Missing                                                                                            | 7 (0.2%)                       | 2 (0.2%)                                            | 2 (0.2%)                                       | 1 (0.1%)                            | 2 (0.1%)                                             | 0 (0%)                                          |                     |
| Concern about loved ones getting infected with SARS-CoV-2                                          |                                |                                                     |                                                |                                     |                                                      |                                                 | <.001               |
| Not at all worried/not too worried                                                                 | 695 (14.5%)                    | 161 (17.5%)                                         | 160 (13%)                                      | 82 (9.2%)                           | 254 (16.1%)                                          | 38 (22.2%)                                      |                     |
| Somewhat worried                                                                                   | 1968 (41.1%)                   | 333 (36.2%)                                         | 524 (42.4%)                                    | 386 (43.4%)                         | 660 (41.8%)                                          | 65 (38%)                                        |                     |

|                                                                 | <b>Overall<br/>4793 (100%)</b> | <b>Noninvasive<br/>home testers<br/>920 (19.2%)</b> | <b>Fast-track<br/>testers<br/>1235 (25.8%)</b> | <b>Dual testers<br/>889 (18.5%)</b> | <b>Noninvasive<br/>dual testers<br/>1,78 (32.9%)</b> | <b>Hesitant home<br/>testers<br/>171 (3.6%)</b> | <b>P-<br/>value</b> |
|-----------------------------------------------------------------|--------------------------------|-----------------------------------------------------|------------------------------------------------|-------------------------------------|------------------------------------------------------|-------------------------------------------------|---------------------|
|                                                                 | <b>N (%)</b>                   | <b>N (%)</b>                                        | <b>N (%)</b>                                   | <b>N (%)</b>                        | <b>N (%)</b>                                         | <b>N (%)</b>                                    |                     |
| Very worried                                                    | 2121 (44.3%)                   | 423 (46%)                                           | 549 (44.5%)                                    | 420 (47.2%)                         | 662 (42%)                                            | 67 (39.2%)                                      |                     |
| Missing                                                         | 9 (0.2%)                       | 3 (0.3%)                                            | 2 (0.2%)                                       | 1 (0.1%)                            | 2 (0.1%)                                             | 1 (0.6%)                                        |                     |
| Concern about hospitals getting<br>overwhelmed by COVID-19      |                                |                                                     |                                                |                                     |                                                      |                                                 | <.001               |
| Not at all worried/not too<br>worried                           | 958 (20%)                      | 205 (22.3%)                                         | 238 (19.3%)                                    | 112 (12.6%)                         | 348 (22.1%)                                          | 55 (32.2%)                                      |                     |
| Somewhat worried                                                | 2252 (47%)                     | 410 (44.6%)                                         | 591 (47.9%)                                    | 445 (50.1%)                         | 751 (47.6%)                                          | 55 (32.2%)                                      |                     |
| Very worried                                                    | 1574 (32.8%)                   | 302 (32.8%)                                         | 404 (32.7%)                                    | 331 (37.2%)                         | 477 (30.2%)                                          | 60 (35.1%)                                      |                     |
| Missing                                                         | 9 (0.2%)                       | 3 (0.3%)                                            | 2 (0.2%)                                       | 1 (0.1%)                            | 2 (0.1%)                                             | 1 (0.6%)                                        |                     |
| Personally knew someone who had<br>died from COVID-19           | 1083 (22.6%)                   | 197 (21.4%)                                         | 320 (25.9%)                                    | 200 (22.5%)                         | 332 (21%)                                            | 34 (19.9%)                                      | .02                 |
| Submitted DBS for serology in the<br>CHASING COVID Cohort study | 3771 (78.7%)                   | 671 (72.9%)                                         | 915 (74.1%)                                    | 741 (83.4%)                         | 1323 (83.8%)                                         | 121 (70.8%)                                     | <.001               |
| DBS reactive                                                    | 113 (3%)                       | 18 (2.7%)                                           | 36 (3.9%)                                      | 18 (2.4%)                           | 38 (2.9%)                                            | 3 (2.5%)                                        | .41                 |

<sup>a</sup>Among those who did not report previously receiving a COVID-19 diagnosis

<sup>b</sup>DBS=Dried blood spot
